# Supplementary material for: Anion-dependent host–guest properties of porous assemblies of coordination complexes (PACs), [Cu(A)2(py)4] (A = PF6, BF4, CF3SO3, and CH3SO3; py = pyridine), based on Werner-type copper(ii) complexes in the solid state
Source: Royal Society of Chemistry journal article supplement (doi:10.1039/c3dt51104a), 2013-01-01
Supplement: c3dt51104a.pdf [file c3dt51104a.pdf]

## Supporting Information

# **Anion-dependent host–guest properties of porous assemblies of coordination complexes (PACs), [Cu(A)<sub>2</sub>(py)<sub>4</sub>] (A = PF<sub>6</sub>, BF<sub>4</sub>, CF<sub>3</sub>SO<sub>3</sub>, and CH<sub>3</sub>SO<sub>3</sub>; py = pyridine), based on Werner-type copper(II) compounds in the solid state**

Shin-ichiro Noro,<sup>\*a,b,c</sup> Katsuo Fukuhara,<sup>b</sup> Kuniyoshi Sugimoto,<sup>d</sup> Yuh Hijikata,<sup>e</sup> Kazuya Kubo,<sup>a,b</sup> and Takayoshi Nakamura<sup>\*a,b</sup>

<sup>a</sup> Research Institute for Electronic Science, Hokkaido University, Sapporo 001-0020, Japan

<sup>b</sup> Graduate School of Environmental Earth Science, Hokkaido University, Sapporo 060-0810, Japan

<sup>c</sup> PRESTO, Japan Science and Technology Agency (JST), 4-1-8 Honcho Kawaguchi, Saitama 332-0012, Japan

<sup>d</sup> Research & Utilization Division, Japan Synchrotron Radiation Research Institute, Hyogo 679-5198, Japan

<sup>e</sup> Fukui Institute for Fundamental Chemistry, Kyoto University, Kyoto 606-8103, Japan

**Table S1.** P–F Bond distances (Å) for  $\alpha$ -[Cu(PF<sub>6</sub>)<sub>2</sub>(py)<sub>4</sub>] ( $\alpha$ -**PAC-2-PF<sub>6</sub>**),  $\gamma$ -{[Cu(PF<sub>6</sub>)<sub>2</sub>(py)<sub>4</sub>]·2acetone} ( $\gamma$ -**PAC-2-PF<sub>6</sub>**⊃2acetone), and  $\gamma$ -{[Cu(PF<sub>6</sub>)<sub>2</sub>(py)<sub>4</sub>]·2py} ( $\gamma$ -**PAC-2-PF<sub>6</sub>**⊃2py).

| $\alpha$ - <b>PAC-2-PF<sub>6</sub></b>           |          |            |          |
|--------------------------------------------------|----------|------------|----------|
| P(1)–F(1) <sup>a</sup>                           | 1.628(1) | P(1)–F(2)  | 1.583(2) |
| P(1)–F(3)                                        | 1.587(1) | P(1)–F(4)  | 1.589(1) |
| P(1)–F(5)                                        | 1.597(1) | P(1)–F(6)  | 1.590(1) |
| P(2)–F(7) <sup>a</sup>                           | 1.627(1) | P(2)–F(8)  | 1.588(1) |
| P(2)–F(9)                                        | 1.599(1) | P(2)–F(10) | 1.588(1) |
| P(2)–F(11)                                       | 1.605(1) | P(2)–F(12) | 1.593(1) |
| $\gamma$ - <b>PAC-2-PF<sub>6</sub></b> ⊃2acetone |          |            |          |
| P–F(1) <sup>a</sup>                              | 1.630(1) | P–F(2)     | 1.594(1) |
| P–F(3)                                           | 1.596(1) | P–F(4)     | 1.587(1) |
| P–F(5)                                           | 1.593(1) | P–F(6)     | 1.586(1) |
| $\gamma$ - <b>PAC-2-PF<sub>6</sub></b> ⊃2py      |          |            |          |
| P–F(1) <sup>a</sup>                              | 1.624(3) | P–F(2)     | 1.596(3) |
| P–F(3)                                           | 1.588(1) |            |          |

<sup>a</sup> These F atoms are located on the axial sites of each metal ion.

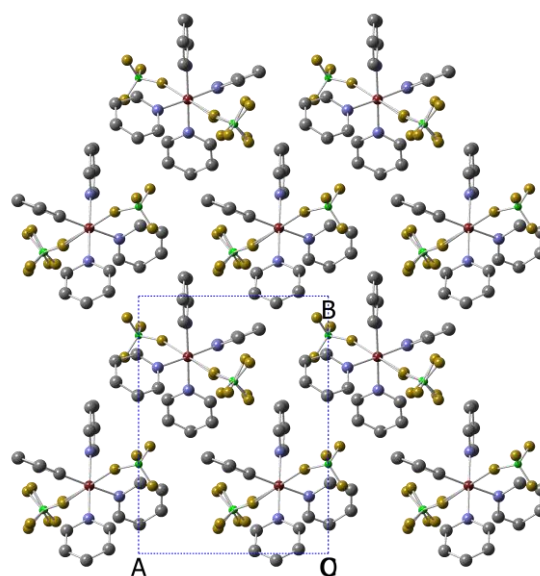

**Fig. S1** Two-dimensional layer of  $\alpha$ -PAC-2-BF<sub>4</sub> in the projection along the *c*-axis. The hydrogen atoms are omitted for clarity.

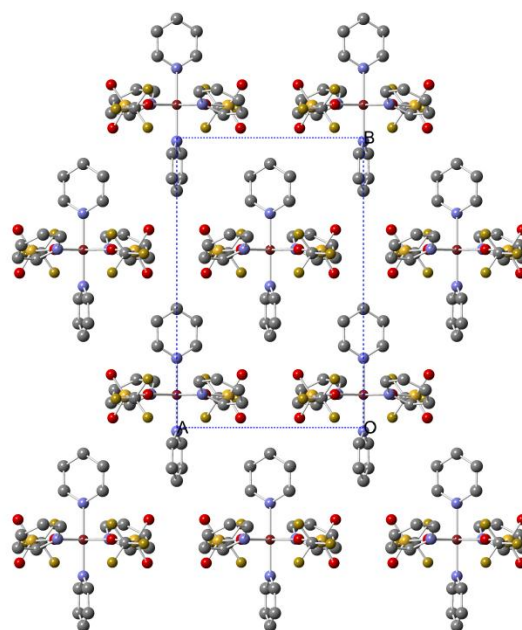

**Fig. S2** Two-dimensional layer of  $\alpha$ -PAC-2-CF<sub>3</sub>SO<sub>3</sub> in the projection along the *c*-axis. The hydrogen atoms are omitted for clarity.

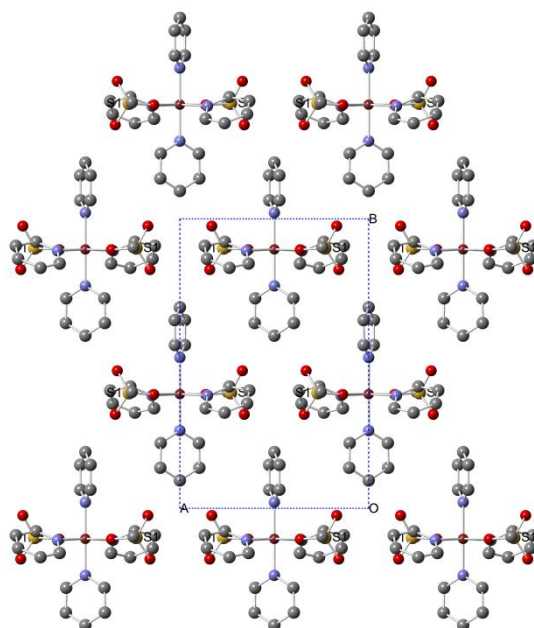

**Fig. S3** Two-dimensional layer of  $\alpha$ -PAC-2-CH<sub>3</sub>SO<sub>3</sub> in the projection along the *c*-axis. The hydrogen atoms are omitted for clarity.

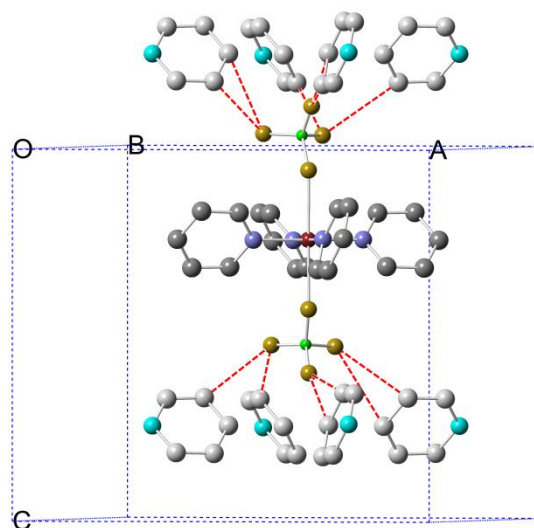

**Fig. S4** View of intermolecular hydrogen-bonding interactions in  $\gamma$ -PAC-2-BF<sub>4</sub>·2acetone. The py molecules of other mononuclear complexes are represented in faint colors. The hydrogen atoms are omitted for clarity.

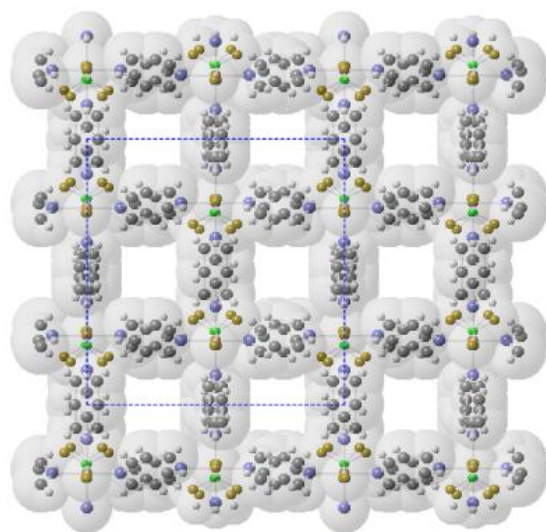

**Fig. S5** Porous aggregate of  $\gamma$ -PAC-2- $\text{BF}_4$   $\supset$  2acetone in the projection along the  $c$ -axis. The guest molecules are omitted for clarity.

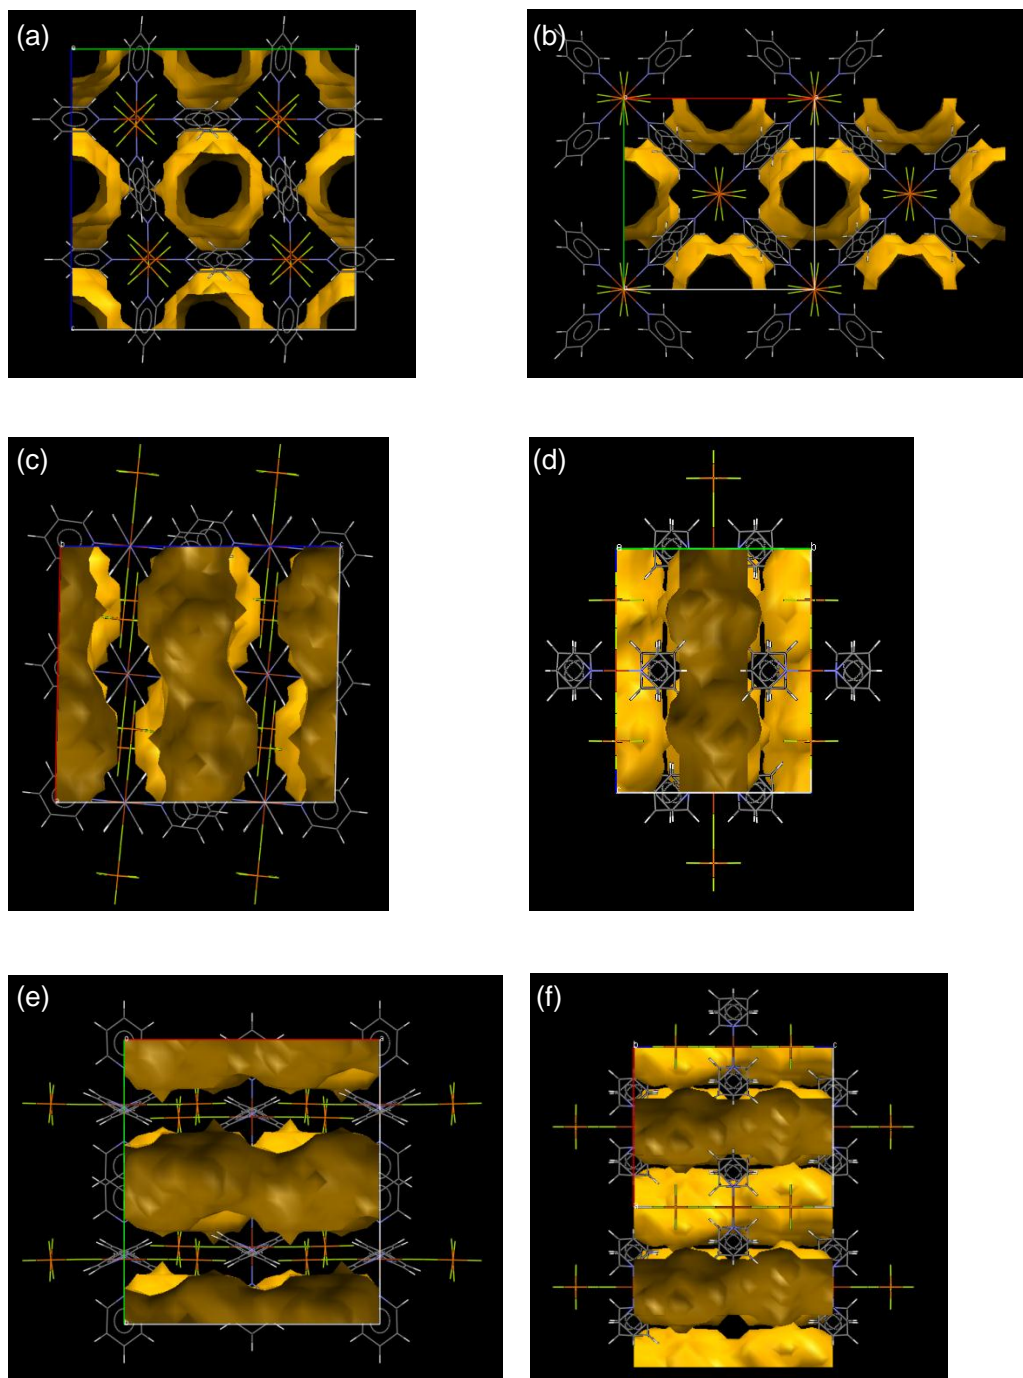

**Fig. S6** One-dimensional channel structure of (a, c, and e)  $\gamma$ -PAC-2-PF<sub>6</sub>⊃2acetone and (b, d, and f)  $\gamma$ -PAC-2-PF<sub>6</sub>⊃2py.

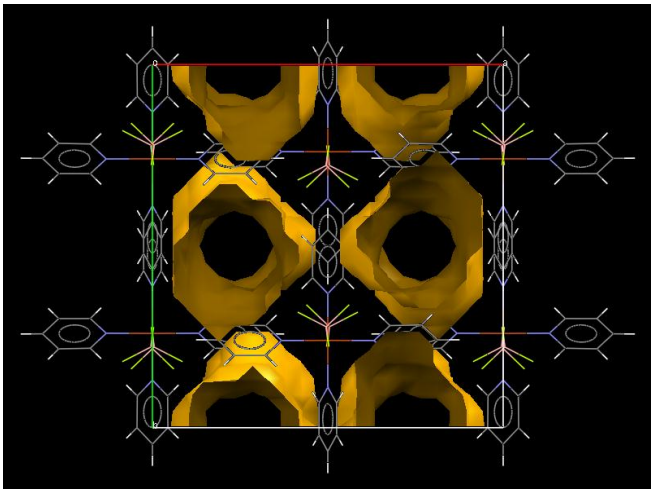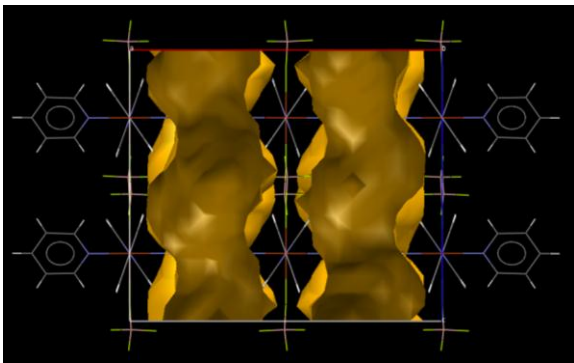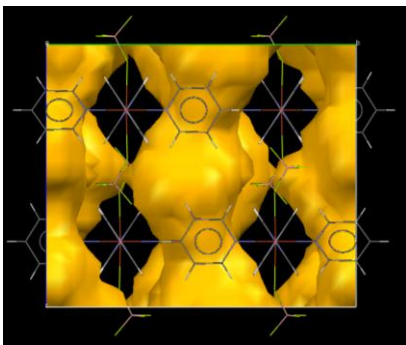

**Fig. S7** One-dimensional channel structure of  $\gamma$ -PAC-2-BF<sub>4</sub>·2acetone.



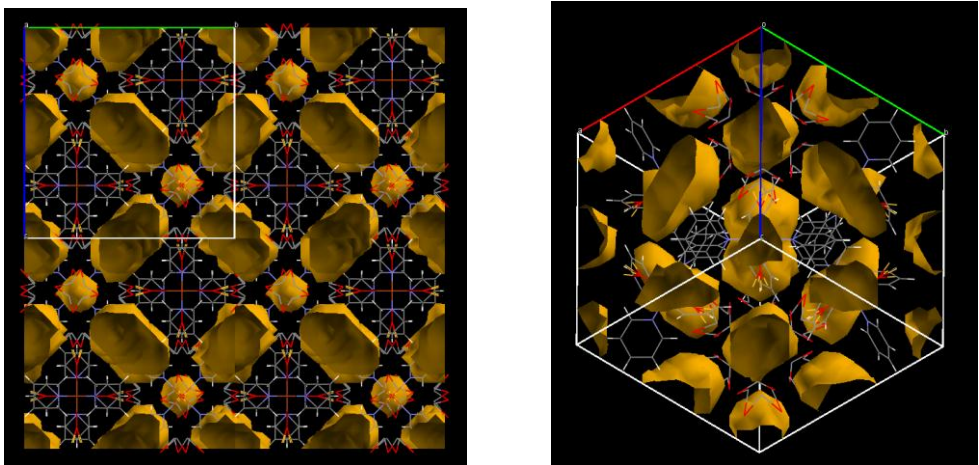

**Fig. S8** Cavity structure of  $\beta$ -PAC-2-CH<sub>3</sub>SO<sub>3</sub>·2.67H<sub>2</sub>O.



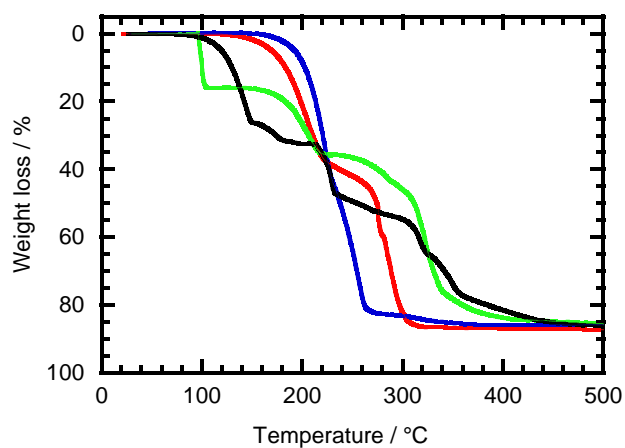

**Fig. S9** TG curves of  $\alpha$ -PAC-2-A (A = PF<sub>6</sub> (red), BF<sub>4</sub> (blue), CF<sub>3</sub>SO<sub>3</sub> (green), and CH<sub>3</sub>SO<sub>3</sub> (black)). First, all complexes lose coordinated py molecules. After that, the decomposition of anions starts, resulting in the formation of CuO as a final product.

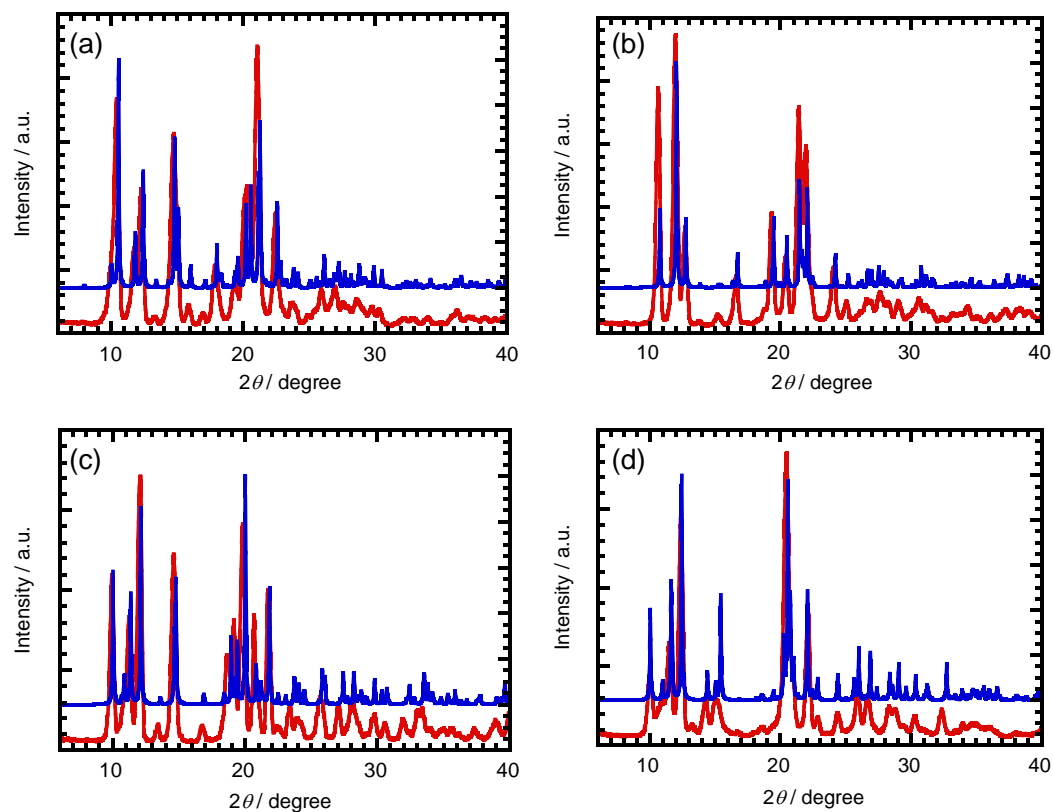

**Fig. S10** The simulated (blue) and observed (red) XRPD patterns of  $\alpha$ -PAC-2-A ( $A =$  (a)  $\text{PF}_6$ , (b)  $\text{BF}_4$ , (c)  $\text{CF}_3\text{SO}_3$ , and (d)  $\text{CH}_3\text{SO}_3$ ).

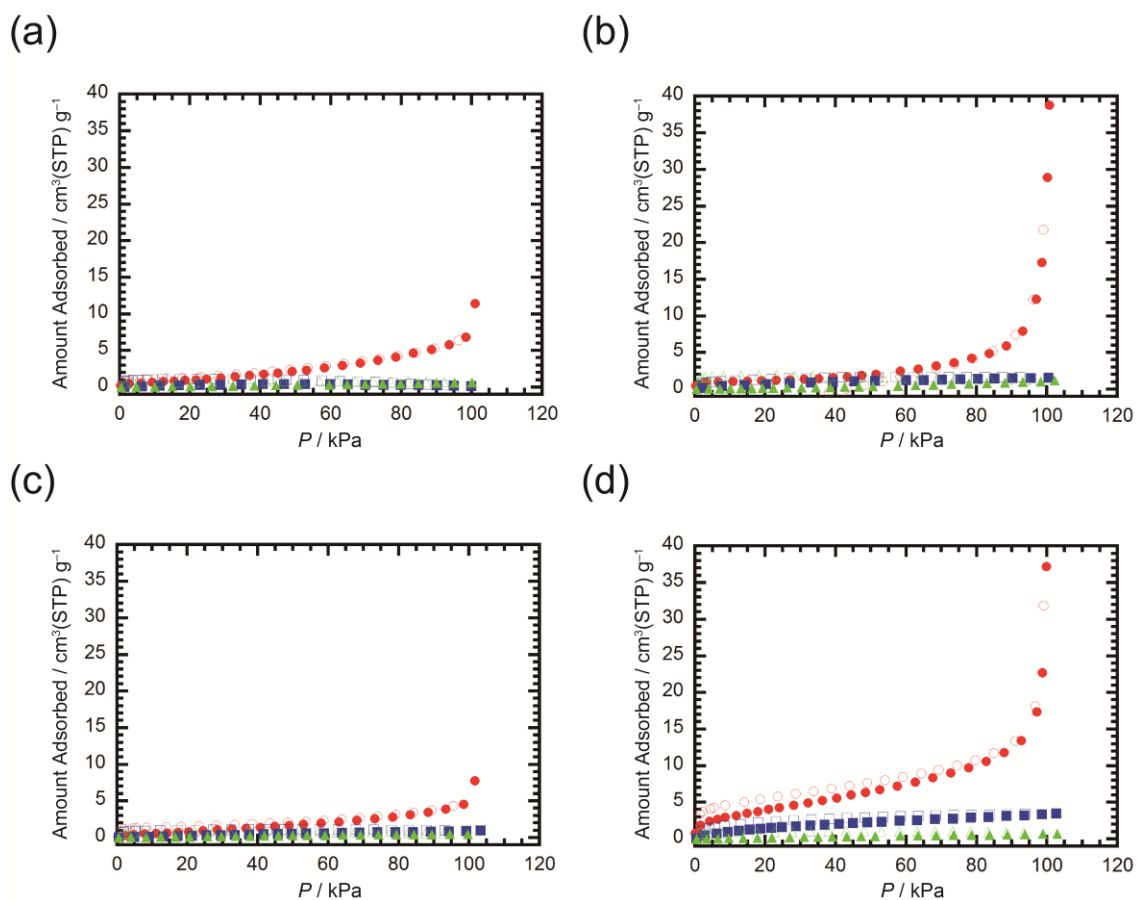

**Fig. S11** Adsorption (filled symbols) and desorption (open symbols) isotherms for  $\text{N}_2$  (77K, red) and  $\text{CO}_2$  (195K (blue) and 273K (green)) in  $\alpha\text{-PAC-2-A}$  ( $A =$  (a)  $\text{PF}_6$ , (b)  $\text{BF}_4$ , (c)  $\text{CF}_3\text{SO}_3$ , and (d)  $\text{CH}_3\text{SO}_3$ ).

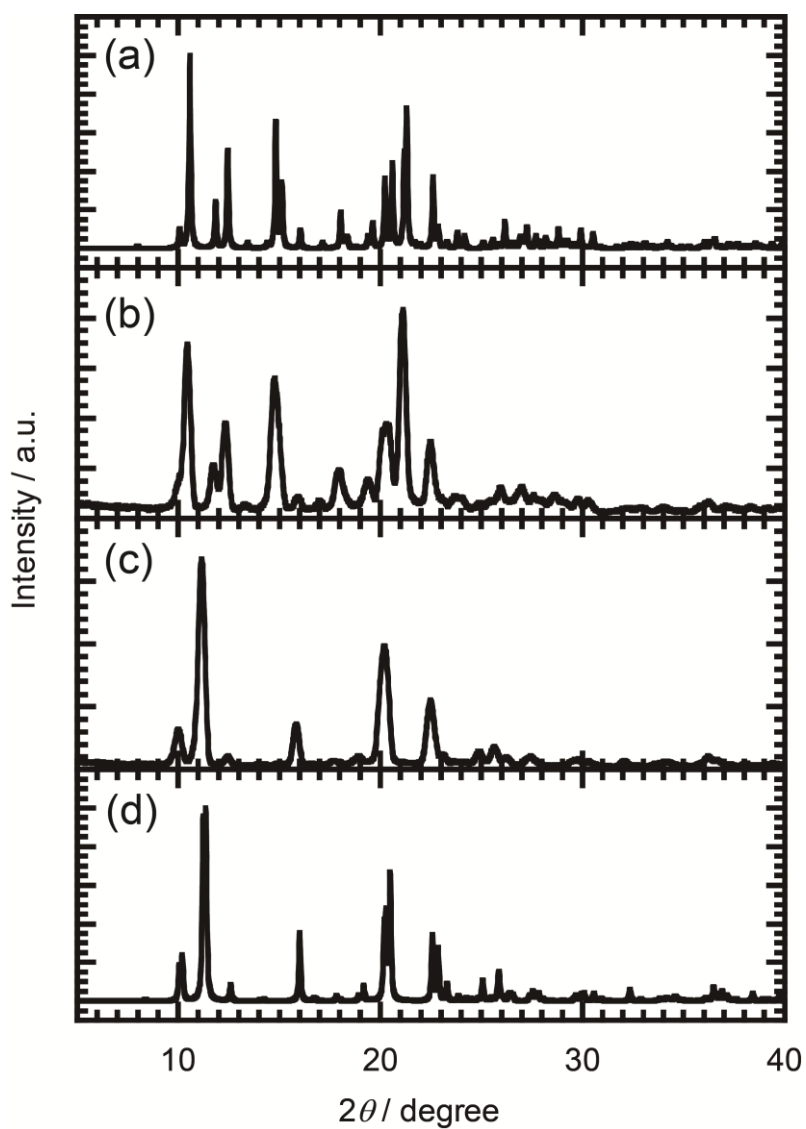

**Fig. S12** XRPD patterns of (a) simulated  $\alpha$ -PAC-2-PF<sub>6</sub> from single-crystal analysis, (b)  $\alpha$ -PAC-2-PF<sub>6</sub>, (c)  $\gamma$ -PAC-2-PF<sub>6</sub>·x(acetone) obtained by exposure of  $\alpha$ -PAC-2-PF<sub>6</sub> to a saturated acetone vapor for 5 hours, and (d) simulated  $\gamma$ -PAC-2-PF<sub>6</sub>·2acetone from single-crystal analysis.

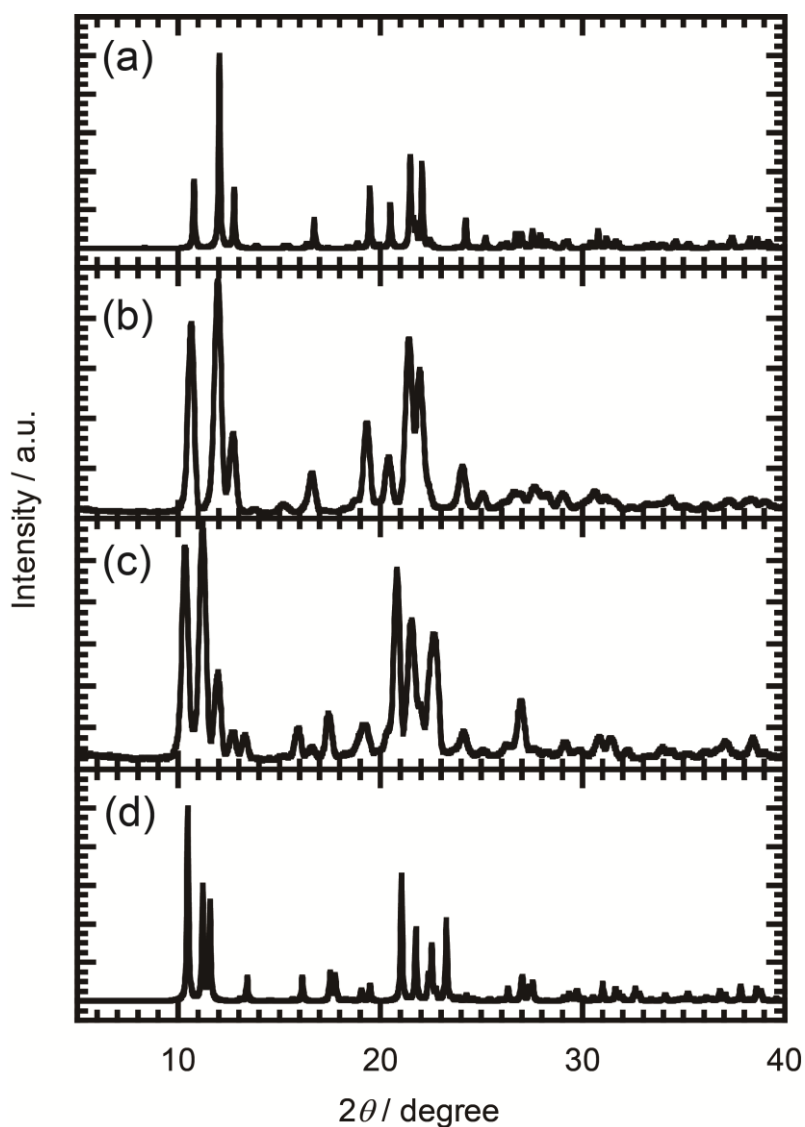

**Fig. S13** XRPD patterns of (a) simulated  $\alpha$ -PAC-2-BF<sub>4</sub> from single-crystal analysis, (b)  $\alpha$ -PAC-2-BF<sub>4</sub>, (c)  $\gamma$ -PAC-2-BF<sub>4</sub>·x(acetone) obtained by an exposure of  $\alpha$ -PAC-2-BF<sub>4</sub> to a saturated acetone vapor for 57.5 hours, and (d) simulated  $\gamma$ -PAC-2-BF<sub>4</sub>·2acetone from single-crystal analysis. As you can see,  $\alpha$ -PAC-2-BF<sub>4</sub> remained after an exposure to a saturated acetone vapor for 57.5 hours.

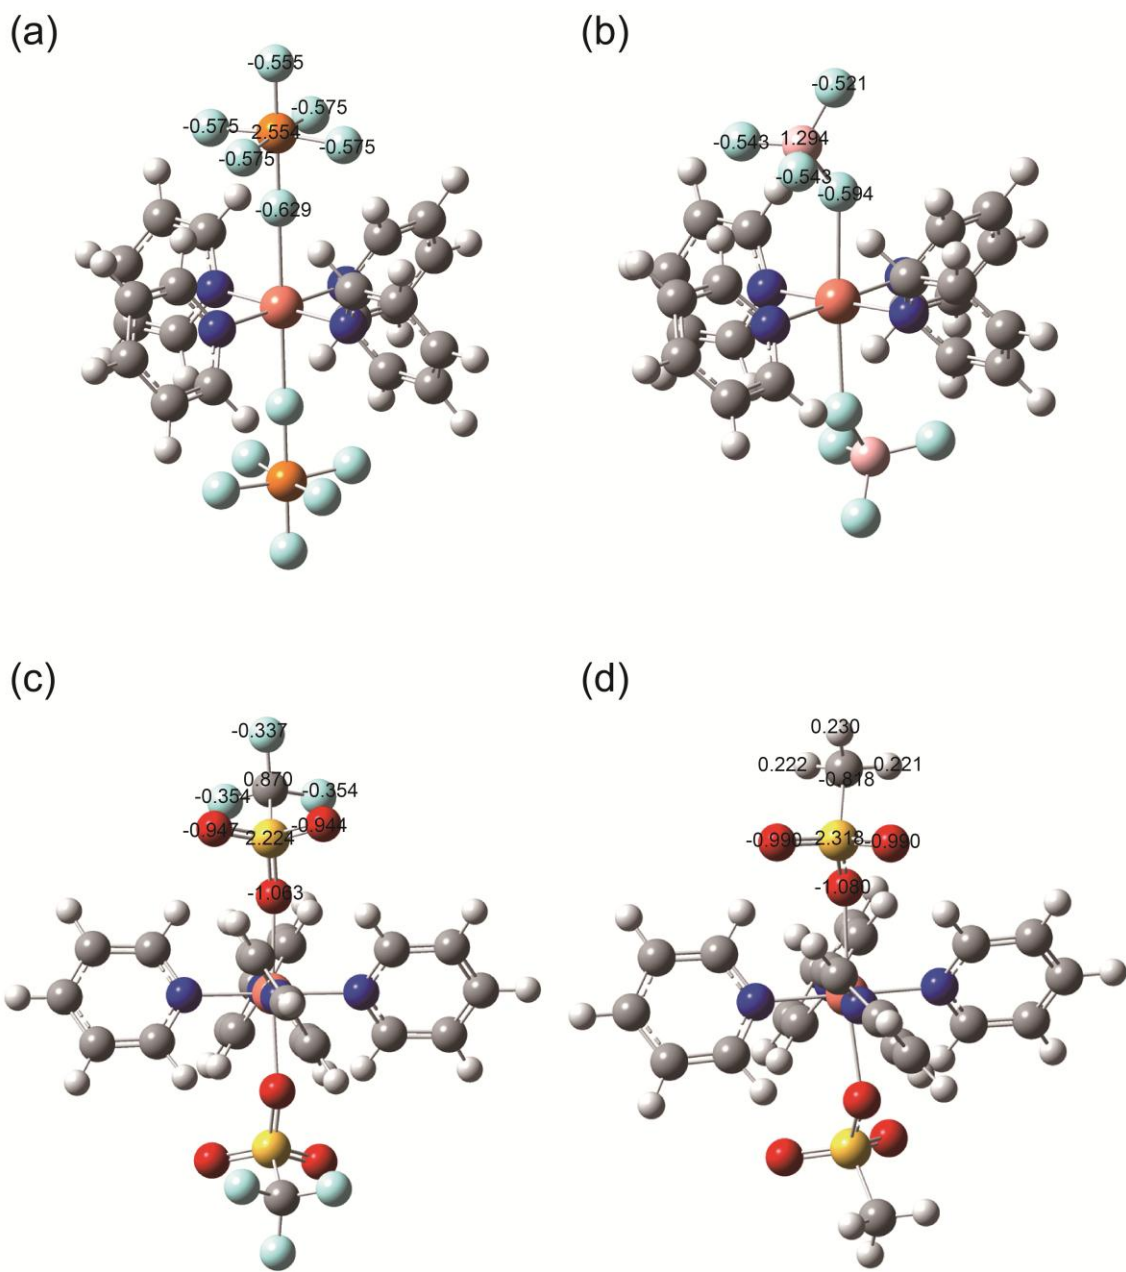

**Fig. S14** NBO charges of anions in  $\alpha$ -PAC-2-A (A = (a)  $\text{PF}_6^-$ , (b)  $\text{BF}_4^-$ , (c)  $\text{CF}_3\text{SO}_3^-$ , and (d)  $\text{CH}_3\text{SO}_3^-$ ).
